# Supplementary material for: Histology of Type 3 Macular Neovascularization and Microvascular Anomalies in Treated Age-Related Macular Degeneration: A Case Study
Source: PubMed Central journal article supplement — Ophthalmol Sci. 2023 Feb 10;3(3):100280. doi: 10.1016/j.xops.2023.100280 (PMC10033755; doi:10.1016/j.xops.2023.100280), 2023-02-10
Supplement: mmc2.pdf [file mmc2.pdf]

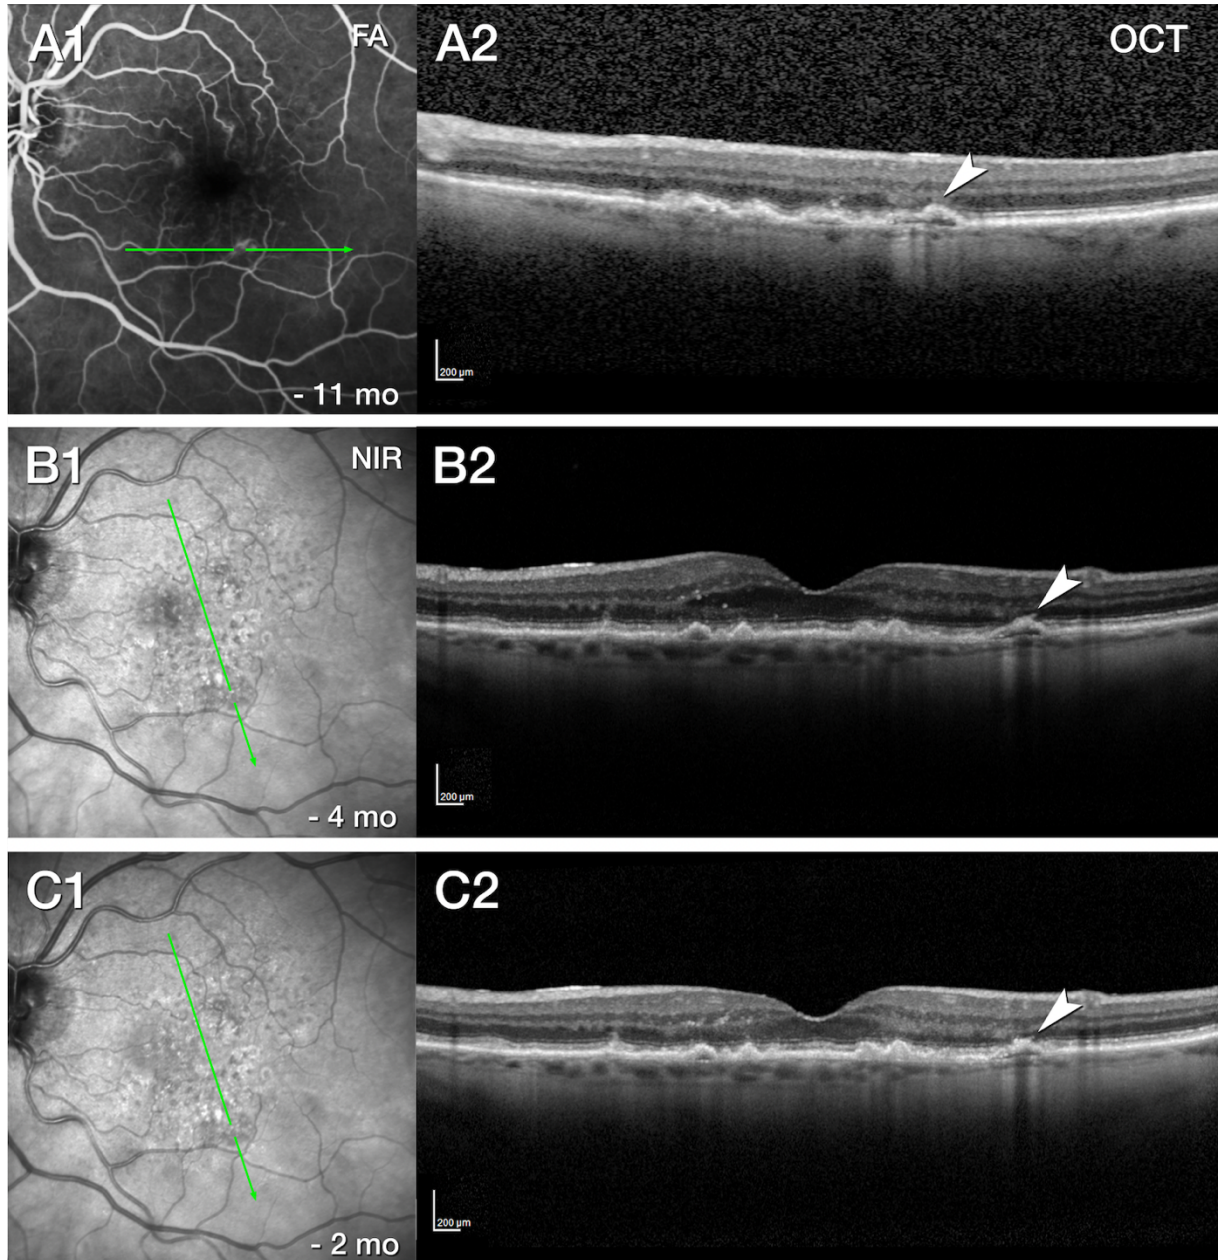

**Figure S2. Hyperfluorescence without histologic correlate, OS 2**

**A.** Fluorescein angiography (FA, **A1**) venous phase, 11 months before death, shows multiple instances of hyperfluorescence. An optical coherence tomography (OCT) B-scan (green line) displays drusen, a double-layer sign (white arrowhead), choroidal hypertransmission, and hyperreflective foci (**A2**).

**B, C.** At 4 and 2 months before death, with 5 (**B**) and 6 (**C**) total injections, respectively, the lesion is stable, without intraretinal cysts.
