# Supplementary material for: Histology of Type 3 Macular Neovascularization and Microvascular Anomalies in Treated Age-Related Macular Degeneration: A Case Study
Source: PubMed Central journal article supplement — Ophthalmol Sci. 2023 Feb 10;3(3):100280. doi: 10.1016/j.xops.2023.100280 (PMC10033755; doi:10.1016/j.xops.2023.100280), 2023-02-10
Supplement: mmc3.pdf [file mmc3.pdf]

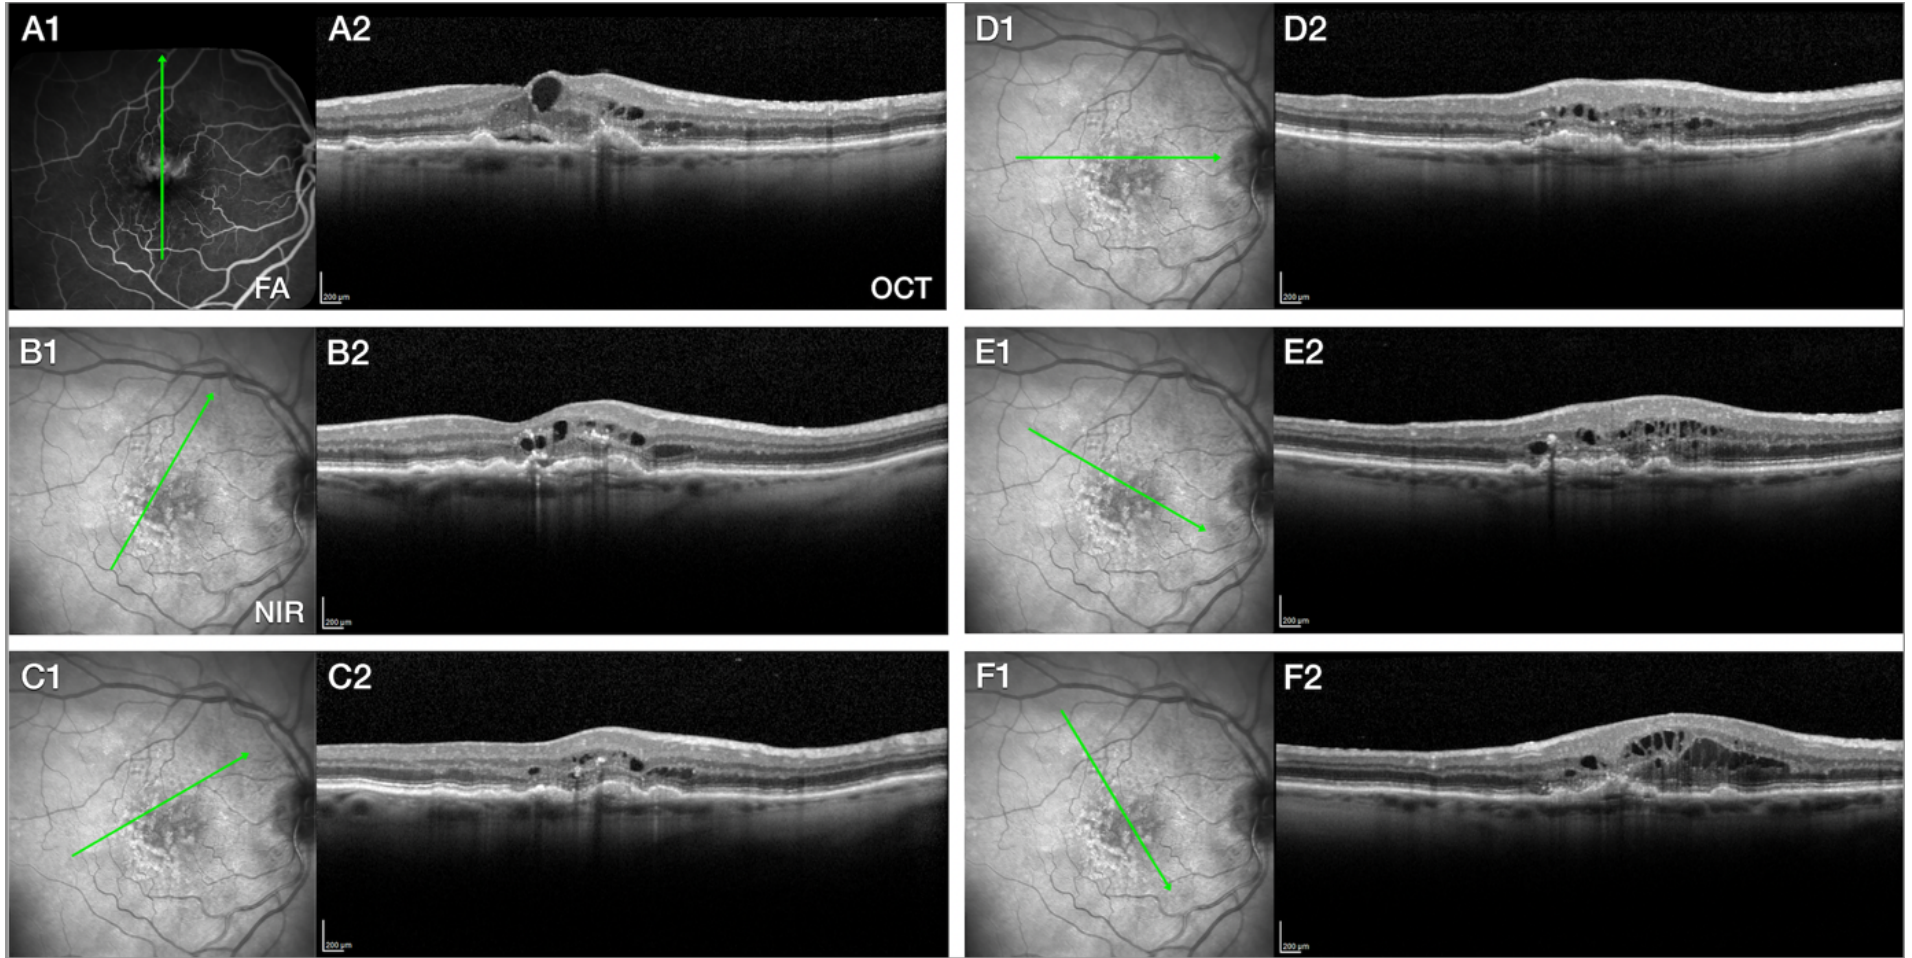

**Figure S3. Initial presentation of right eye, 5 years before death**

**A-E.** Fluorescein angiography (FA), near infrared reflectance images (NIR), and radial optical coherence tomography (OCT) B-scans show exudative age-related macular degeneration in the right eye at initial presentation. Based on these findings anti-VEGF therapy is initiated.

**A.** FA recirculation phase shows marked leakage. Corresponding OCT shows intraretinal and subretinal hyporeflective cysts and spaces representing exudation, located above drusenoid pigment epithelium detachments in the fovea and parafovea.

**B.** NIR and OCT show hyporeflective subretinal drusenoid deposits and hyperreflective soft drusen across the macula. Hyperreflective foci are present in inner and outer nuclear layer.
