# Supplementary material for: Histology of Type 3 Macular Neovascularization and Microvascular Anomalies in Treated Age-Related Macular Degeneration: A Case Study
Source: PubMed Central journal article supplement — Ophthalmol Sci. 2023 Feb 10;3(3):100280. doi: 10.1016/j.xops.2023.100280 (PMC10033755; doi:10.1016/j.xops.2023.100280), 2023-02-10
Supplement: mmc4.pdf [file mmc4.pdf]

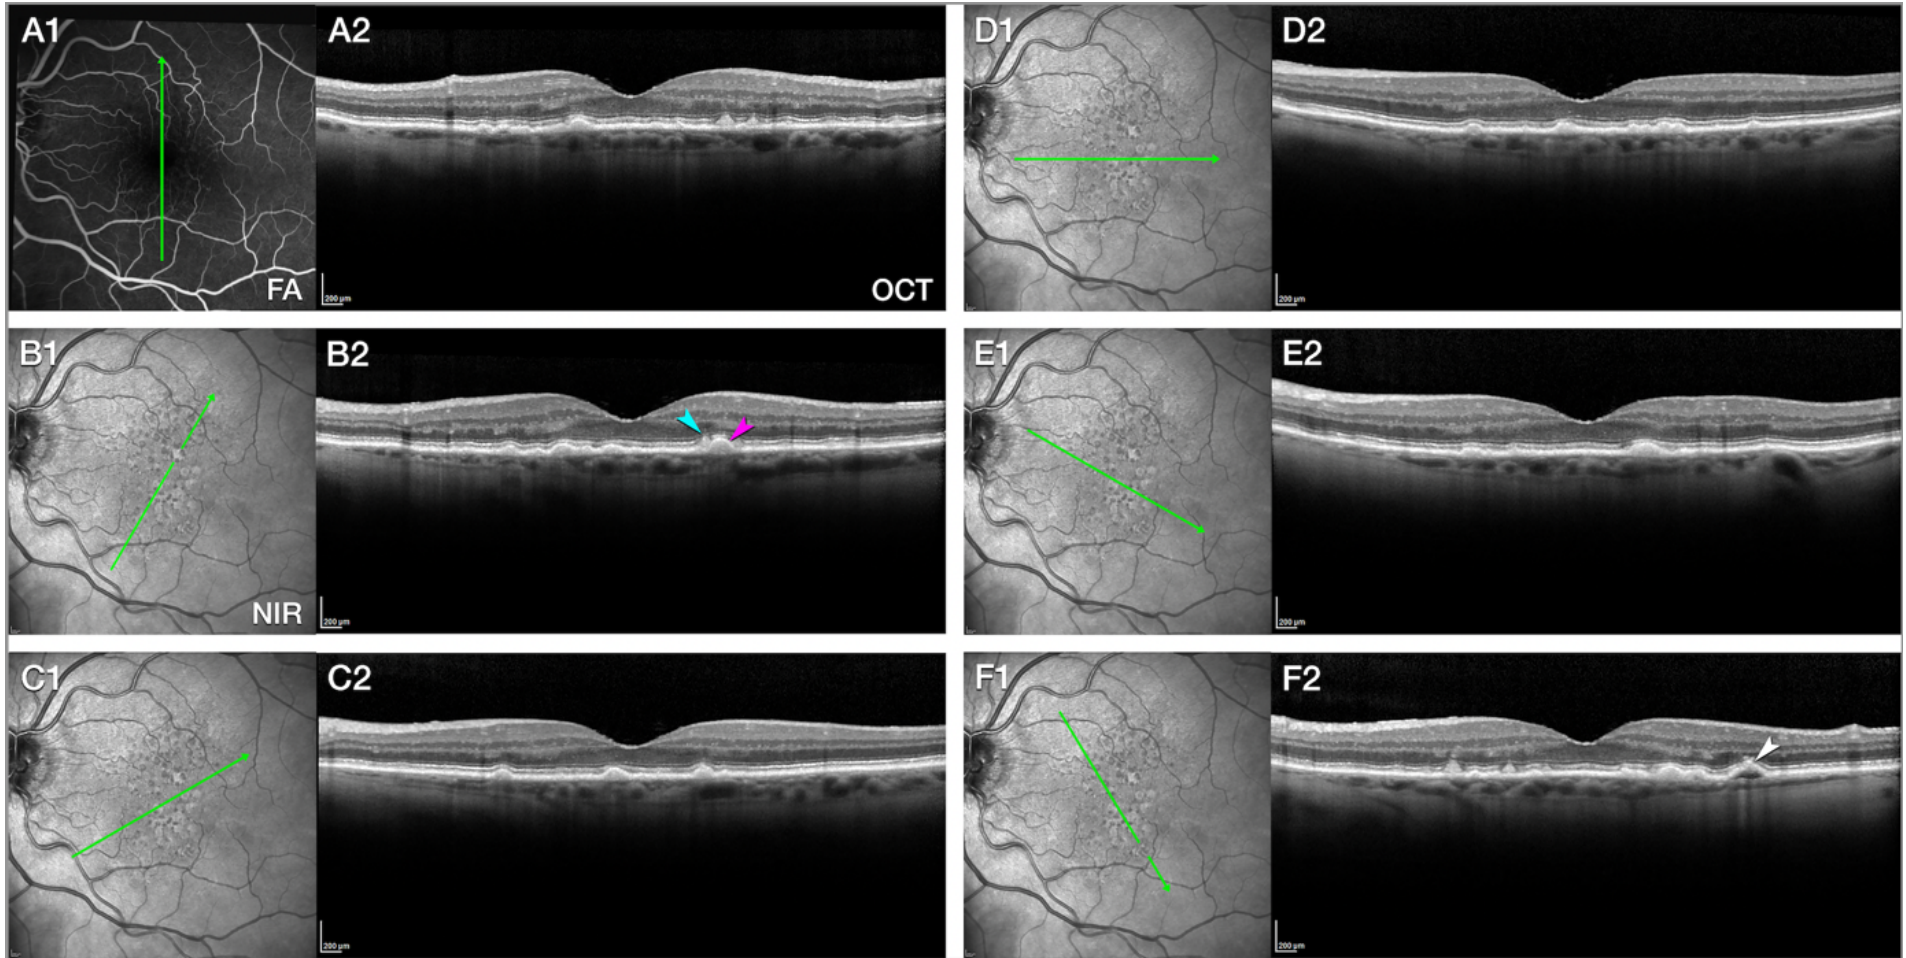

**Figure S4. Initial presentation of left eye, 5 years before death**

**A-E.** Near infrared reflectance images (NIR) and radial optical coherence tomography (OCT) B-scans show non-exudative age-related macular degeneration in the left eye. Hyporeflective subretinal drusenoid deposits and hyperreflective soft drusen (**B** teal and fuchsia arrowheads respectively) appear across the macula.

**B.** On the recirculation phase of fluorescein angiography (FA), no intraretinal or subretinal fluid or leakage is present, ensuring absence of active MNV exudation.

**F.** A shallow RPE elevation with choroidal hypertransmission (white arrowhead) and hyperreflective focus was stable on longitudinal follow-up by OCT (**Figure S4**). No vessel was found in histology. This lesion presumably corresponds to a calcified druse.<sup>38</sup>
