# Supplementary material for: Histology of Type 3 Macular Neovascularization and Microvascular Anomalies in Treated Age-Related Macular Degeneration: A Case Study
Source: PubMed Central journal article supplement — Ophthalmol Sci. 2023 Feb 10;3(3):100280. doi: 10.1016/j.xops.2023.100280 (PMC10033755; doi:10.1016/j.xops.2023.100280), 2023-02-10
Supplement: mmc5.pdf [file mmc5.pdf]

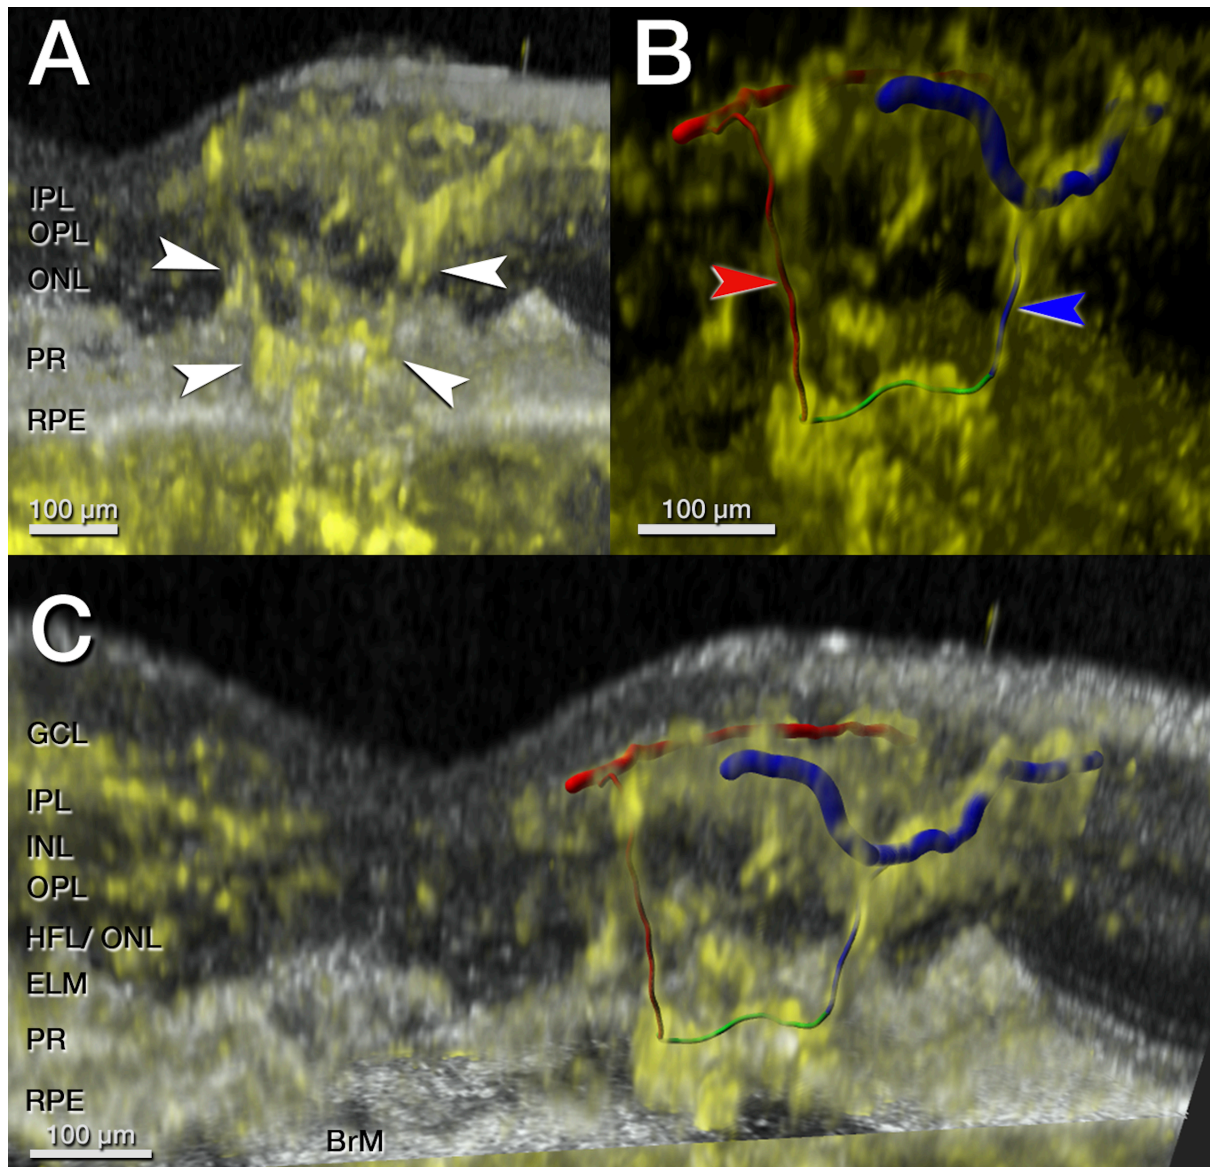

**Figure S9. Volume rendering of structural optical coherence tomography (OCT, gray) and OCT angiography (OCTA, yellow) of tangled type 3 MNV, OD 1.**

**A.** Neovascular blood flow within a hyperreflective structure (white arrowheads) is observed at the level of the outer nuclear layer (ONL).

**B.** Three-dimensional analysis of neovascular blood flow depict an anastomosis above the retinal pigment epithelium (RPE)/ Bruch's membrane (BrM; green section) and a tangled structure connecting to the superficial artery (red arrow) and vein (blue arrow).

**C.** Volume rendering of OCTA with orthogonal structural sections evidence a tangled neovascular lesion.
