# Supplementary material for: Histology of Type 3 Macular Neovascularization and Microvascular Anomalies in Treated Age-Related Macular Degeneration: A Case Study
Source: PubMed Central journal article supplement — Ophthalmol Sci. 2023 Feb 10;3(3):100280. doi: 10.1016/j.xops.2023.100280 (PMC10033755; doi:10.1016/j.xops.2023.100280), 2023-02-10
Supplement: mmc6.pdf [file mmc6.pdf]

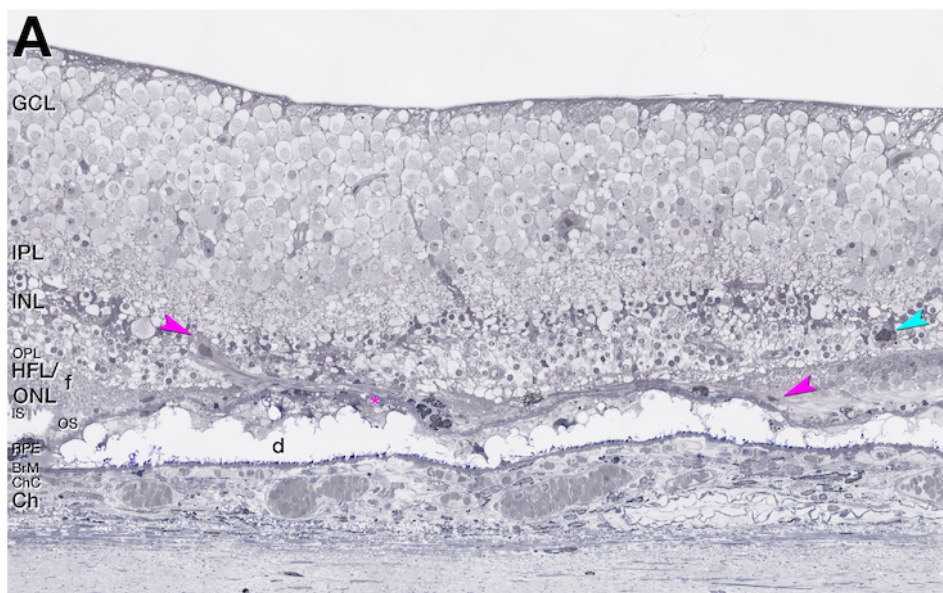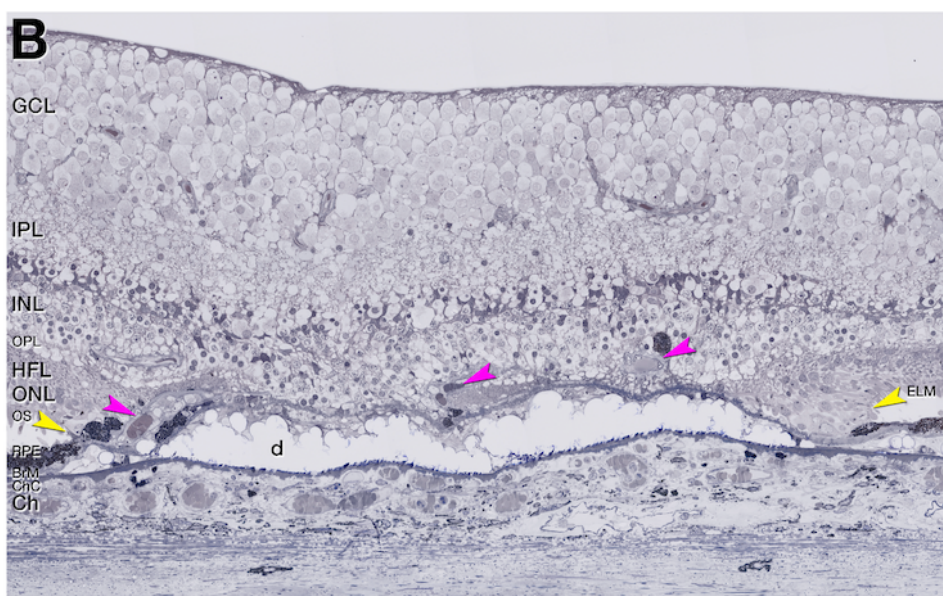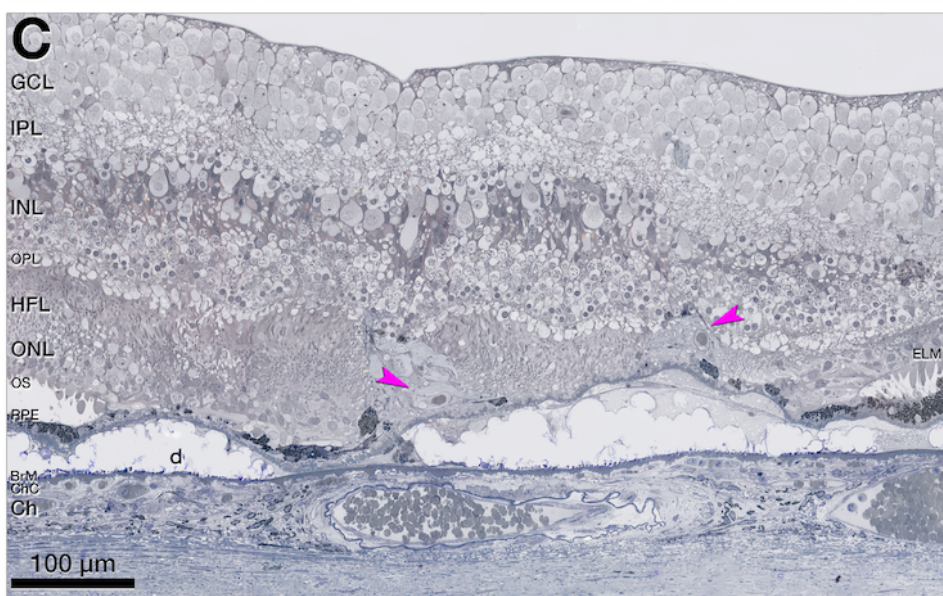

**Figure S10. Tangled vascular complex in type 3 MNV, OD 1.**

**A-C.** Tangled vascular complex (fuchsia arrowheads indicate lumen) spans 249  $\mu\text{m}$  horizontally towards the superior perifovea (**A**, 759  $\mu\text{m}$  from fovea; **B**, 719  $\mu\text{m}$  from fovea; **C**, 552  $\mu\text{m}$  from fovea). The complex is partly ensheathed by collagenous material and is flanked by retinal pigment epithelium (RPE) cells. Two cells rest entirely within the outer plexiform layer (OPL)/ inner nuclear layer (INL; light blue arrowhead in **A**). The INL/OPL subsides, and the vascular complex extends from the INL/OPL border through the Henle fiber layer (HFL)/ outer nuclear layer (ONL). The complex adheres to basal laminar deposits (BLamD) draping a calcified druse (d). Bruch's membrane (BrM) appears intact without evidence of a choroidal contribution. The external limiting membrane (ELM) descends at both edges of the calcified druse (yellow arrowheads in **B**). Vessel walls do not exhibit obvious arterial or venous features. Vessel diameter within the INL was larger than 15  $\mu\text{m}$ , suggesting drainage venules.
