# Supplementary material for: Histology of Type 3 Macular Neovascularization and Microvascular Anomalies in Treated Age-Related Macular Degeneration: A Case Study
Source: PubMed Central journal article supplement — Ophthalmol Sci. 2023 Feb 10;3(3):100280. doi: 10.1016/j.xops.2023.100280 (PMC10033755; doi:10.1016/j.xops.2023.100280), 2023-02-10
Supplement: mmc7.pdf [file mmc7.pdf]

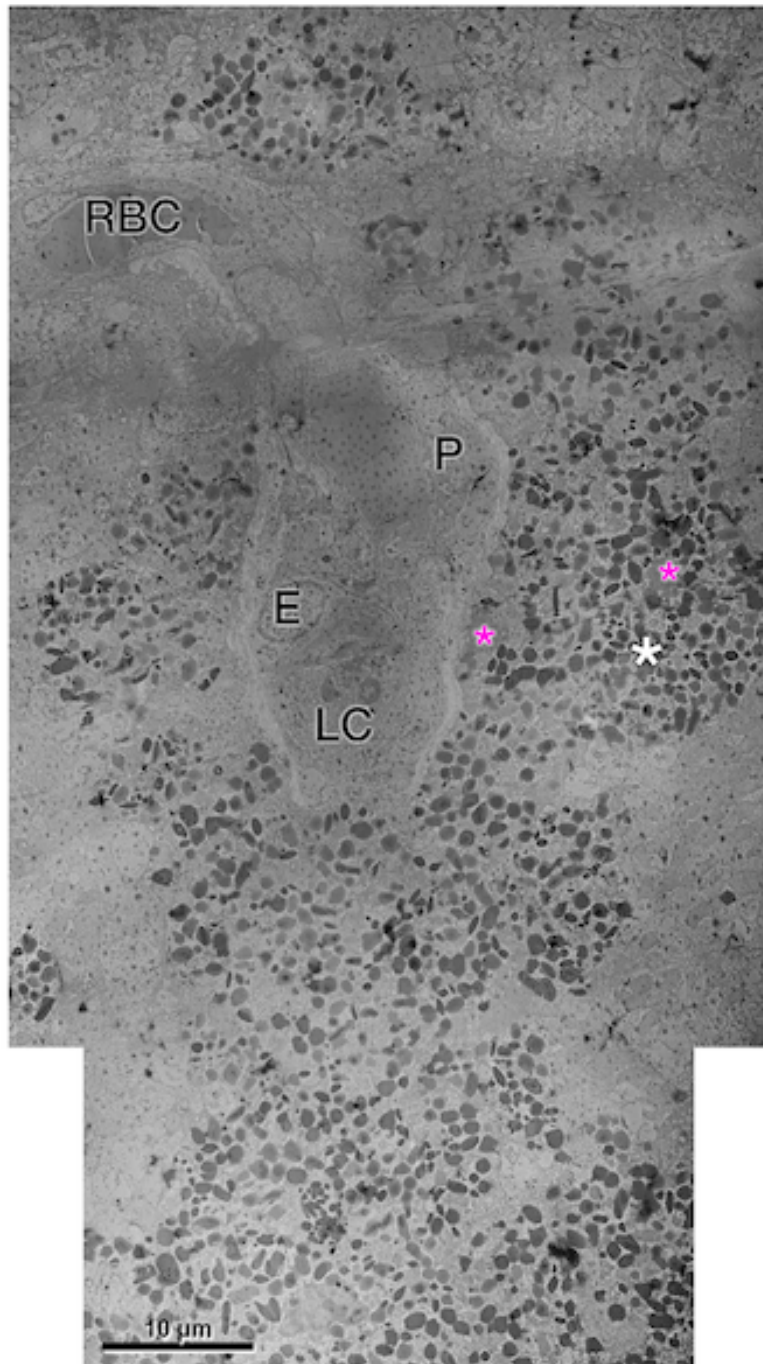

**Figure S14. Transmission electron microscopy of DRAMA with RPE complex, OS 3.**

The Vessel is ensheathed by an endothelial (E) cell and a pericyte (P), with little collagen. The Lumen contains a leukocyte (LC) and a red blood cell (RBC). The surrounding tower of retinal pigment epithelium (RPE) is multicellular (white asterisk), and multinucleated (fuchsia asterisks). RPE organelle packing density and electron-density is similar to in-layer RPE cells (not shown).
