# Supplementary material for: Histology of Type 3 Macular Neovascularization and Microvascular Anomalies in Treated Age-Related Macular Degeneration: A Case Study
Source: PubMed Central journal article supplement — Ophthalmol Sci. 2023 Feb 10;3(3):100280. doi: 10.1016/j.xops.2023.100280 (PMC10033755; doi:10.1016/j.xops.2023.100280), 2023-02-10
Supplement: mmc8.pdf [file mmc8.pdf]

1 **Table S1. Content of imaging data pieces**

| <b>figure number as appearing</b> | <b>Laterality and lesion number</b> | <b>Lesion type</b> | <b>Content</b>                                     | <b>Title</b>                                                                                                                           |
|-----------------------------------|-------------------------------------|--------------------|----------------------------------------------------|----------------------------------------------------------------------------------------------------------------------------------------|
| <b>1</b>                          | NA                                  | NA                 | multimodal imaging                                 | Multimodal retinal imaging of both eyes, 11 months before death                                                                        |
| <b>S2</b>                         | OS2                                 | type 3 MNV         | Clinicopathologic correlation, panoramic histology | Hyperfluorescence without histologic correlate, OS2.                                                                                   |
| <b>S3</b>                         | NA                                  | NA                 | clinical imaging baseline                          | Initial presentation of right eye, 5 years before death                                                                                |
| <b>S4</b>                         | NA                                  | NA                 | clinical imaging baseline                          | Initial presentation of left eye, 5 years before death                                                                                 |
| <b>5</b>                          | OS4                                 | type 3 MNV         | Clinicopathologic correlation, panoramic histology | Multimodal imaging, clinical course, and histology of pyramidal type 3 MNV, OS4.                                                       |
| <b>6</b>                          | OS4                                 | type 3 MNV         | Magnified histology                                | <u>Pyramidal vascular complex in type 3 MNV, OS4.</u>                                                                                  |
| <b>7</b>                          | OS4                                 | type 3 MNV         | Transmission electron microscopy                   | Transmission electron microscopy of pyramidal type 3 MNV, OS4                                                                          |
| <b>8</b>                          | OD1                                 | type 3 MNV         | Clinicopathologic correlation, panoramic histology | Multimodal imaging, clinical course, and histology of tangled type 3 MNV, OD1.                                                         |
| <b>S9</b>                         | OD1                                 | type 3 MNV         | 3D Volume rendering                                | Volume rendering of structural optical coherence tomography (OCT, gray) and OCT angiography (OCTA, yellow) of tangled type 3 MNV, OD1. |

|            |     |                                |                                                        |                                                                                                                                |
|------------|-----|--------------------------------|--------------------------------------------------------|--------------------------------------------------------------------------------------------------------------------------------|
| <b>S10</b> | OD1 | type 3 MNV                     | Magnified histology                                    | Tangled vascular complex in type 3 MNV, OD1.                                                                                   |
| <b>11</b>  | OS1 | DRAMA/<br>type 3 MNV precursor | Clinicopathologic correlation, panoramic histology     | Deep retinal age-related microvascular anomaly (DRAMA), OS1.                                                                   |
| <b>12</b>  | OS3 | DRAMA/<br>type 3 MNV precursor | Clinicopathologic correlation, panoramic histology     | Multimodal imaging and histology of deep retinal age-related microvascular anomaly (DRAMA) with intraretinal RPE complex, OS3. |
| <b>13</b>  | OS3 | DRAMA/<br>type 3 MNV precursor | Magnified histology & Transmission electron microscopy | RPE complex associated with deep retinal age-related microvascular anomaly (DRAMA), OS3.                                       |
| <b>S14</b> | OS3 | DRAMA/<br>type 3 MNV precursor | Transmission electron microscopy                       | Transmission electron microscopy of DRAMA with RPE complex, OS3.                                                               |
| <b>15</b>  | OD3 | DRAMA/<br>type 3 MNV precursor | Clinicopathologic correlation, panoramic histology     | Multimodal imaging of deep retinal age-related microvascular anomalies (DRAMAs), OD3.                                          |
| <b>16</b>  | OD3 | DRAMA/<br>type 3 MNV precursor | Magnified histology                                    | Vascular complex of deep retinal age-related microvascular anomaly (DRAMA), OD3.                                               |

2  
3  
4

T3MNV, type 3 macular neovascularization; DRAMA, deep retinal age-related microvascular anomaly; OD, right eye; OS, left eye.
