# Supplementary material for: Histology of Type 3 Macular Neovascularization and Microvascular Anomalies in Treated Age-Related Macular Degeneration: A Case Study
Source: PubMed Central journal article supplement — Ophthalmol Sci. 2023 Feb 10;3(3):100280. doi: 10.1016/j.xops.2023.100280 (PMC10033755; doi:10.1016/j.xops.2023.100280), 2023-02-10
Supplement: mmc9.pdf [file mmc9.pdf]

**Table S3. Diameters of vessels in histology**

**A. External vessel diameter (µm)**

|      | T3 MNV* |       |       | DRAMA* |       |      | T3 DCP† | Control† | AMD† |
|------|---------|-------|-------|--------|-------|------|---------|----------|------|
|      | OD 1    | OD 2  | OS 4  | OS 1   | OS 3  | OD 3 |         |          |      |
| Mean | 15.02   | 21.35 | 12.46 | 13.39  | 17.97 | 8.62 | 7.18    | 7.86     | 6.79 |
| SD   | 3.81    | 10.79 | 0.95  | 2.68   | 1.08  | 1.05 | 1.11    | 1.47     | 1.05 |

**B. Internal vessel diameter (µm)**

|      | T3 MNV* |       |      | DRAMA* |      |      | T3 DCP† | Control† | AMD†† |
|------|---------|-------|------|--------|------|------|---------|----------|-------|
|      | OD 1    | OD 2  | OS 4 | OS 1   | OS 3 | OD 3 |         |          |       |
| Mean | 9.34    | 14.86 | 9.87 | 9.40   | 8.28 | 5.17 | 3.69    | 4.44     | 3.75  |
| SD   | 1.85    | 6.19  | 0.76 | 2.00   | 0.31 | 0.34 | 0.92    | 0.98     | 0.92  |

\* 3 to 6 measurements for each; T3 MNV, type 3 macular neovascularization; DRAMA, deep retinal age-related microvascular anomaly.

† 8 female control eyes (84.1 ± 6.7 years; 1 male and 7 female), intermediate AMD eyes (83.4 ± 11.6 years). Histology from Project MACULA <https://projectmacula.org>.

Number of measurements, Type 3 DCP (n=123); Controls (n=88); AMD (n=107).

OS2 no lesion identified in histology.
